# Supplementary material
Source: MDPI journal article supplement (https://www.mdpi.com/2073-4433/14/4/641)
Supplement: s1 [file s1]

# Supplementary Material

This document is supplementary material to “Fiorillo, E.; Brilli, L.; Carotenuto, F.; Cremonini, L.; Gioli, B.; Giordano, T.; Nardino, M.; Diurnal outdoor thermal comfort mapping through Envi-met simulations, remotely sensed and in-situ measurements (2023)”.

Corresponding author: Edoardo Fiorillo (edoardo.fiorillo@ibe.cnr.it)

**Table S1.** Physiological Equivalent Temperature (PET) for different grades of thermal sensation and physiological stress on human beings during standard conditions (internal heat production: 80 W, heat transfer resistance of the clothing: 0.9 clo) for Western/Middle Europe (*after Matzarakis and Mayer, 1996*)

| PET (°C) | Thermal perception | Grade of physiological stress |
|----------|--------------------|-------------------------------|
| <4       | Very cold          | Extreme cold stress           |
| 4-8      | Cold               | Strong cold stress            |
| 8-13     | Cool               | Moderate cold stress          |
| 13-18    | Slightly cool      | Slight cold stress            |
| 18-23    | Comfortable        | No thermal stress             |
| 23-29    | Slightly warm      | Slight heat stress            |
| 29-35    | Warm               | Moderate heat stress          |
| 35-41    | Hot                | Strong heat stress            |
| >41      | Very hot           | Extreme heat stress           |

**Table S2.** Selected ECOSTRESS LST scenes used in this study

| Granule Id                                             | DOY | LOCAL TIME | DATE       |
|--------------------------------------------------------|-----|------------|------------|
| ECOSTRESS_L2_LSTE_16802_007_20210623T052417_0601_01.h5 | 174 | 07:24      | 2021-06-23 |
| ECOSTRESS_L2_LSTE_16851_013_20210626T093213_0601_01.h5 | 177 | 11:32      | 2021-06-26 |
| ECOSTRESS_L2_LSTE_16863_005_20210627T035230_0601_01.h5 | 178 | 05:52      | 2021-06-27 |
| ECOSTRESS_L2_LSTE_17229_008_20210720T184012_0601_01.h5 | 201 | 20:39      | 2021-07-20 |
| ECOSTRESS_L2_LSTE_17600_015_20210813T141723_0601_01.h5 | 225 | 16:17      | 2021-08-13 |
| ECOSTRESS_L2_LSTE_17612_007_20210814T083704_0601_01.h5 | 226 | 10:37      | 2021-08-14 |
| ECOSTRESS_L2_LSTE_17674_004_20210818T070519_0601_01.h5 | 230 | 09:05      | 2021-08-18 |
| ECOSTRESS_L2_LSTE_17723_012_20210821T111202_0601_01.h5 | 233 | 13:12      | 2021-08-21 |

**Table S3.** Sentinel 2 scenes used in this study

| Granule Id                                                   | DOY | DATE       |
|--------------------------------------------------------------|-----|------------|
| S2B_MSIL2A_20210627T100559_N0300_R022_T32TPP_20210627T135856 | 178 | 2021-06-27 |
| S2A_MSIL2A_20210722T101031_N0301_R022_T32TPP_20210722T120214 | 203 | 2021-07-22 |
| S2A_MSIL2A_20210811T101031_N0301_R022_T32TPP_20210811T160521 | 223 | 2021-08-11 |
| S2A_MSIL2A_20210821T101031_N0301_R022_T32TPP_20210821T120555 | 233 | 2021-08-21 |

**Table S4.** Meteorological characteristics of the selected days for hUHTI calculation (AVG = average; NA = not available)

| DATE     | DOY | AVG T <sub>air</sub> (°C) | AVG WIND SPEED (m/s) | AVG RELATIVE HUMIDITY (%) |
|----------|-----|---------------------------|----------------------|---------------------------|
| 23/06/21 | 174 | 19                        | 0.6                  | NA                        |
| 26/06/21 | 177 | 15.8                      | 0.7                  | NA                        |
| 27/06/21 | 178 | 17.9                      | 0.7                  | NA                        |
| 20/07/21 | 201 | 20                        | 0.6                  | 42                        |
| 13/08/21 | 225 | 24.2                      | 0.3                  | 40                        |
| 14/08/21 | 226 | 24.4                      | 0.3                  | 37                        |
| 18/08/21 | 230 | 20.9                      | 1.3                  | 41                        |
| 21/08/21 | 233 | 19.2                      | 0.3                  | 43                        |

**Table S5.** Simple linear regression metrics of hUHTI and LST and PET Envi-met modelling outputs (\*= pvalue ≤ 0.05; \*\*= pvalue ≤ 0.01; \*\*\*= pvalue ≤ 0.001)

| DAYTIME | LST            |        |           | hUHTI          |        |           |
|---------|----------------|--------|-----------|----------------|--------|-----------|
|         | R <sup>2</sup> | Slope  | Intercept | R <sup>2</sup> | Slope  | Intercept |
| 06:00   | 0.088          | 0.11   | 23.266    | 0.235          | 1.132  | 24.367    |
| 07:00   | 0.002          | -0.079 | 35.333    | 0.988***       | 12.404 | 25.028    |
| 09:00   | 0.825**        | 2.029  | -11.731   | 0.957***       | 18.531 | 33.304    |
| 11:00   | 0.842***       | 1.708  | -19.184   | 0.909***       | 15.244 | 39.625    |
| 12:00   | 0.879***       | 1.216  | 2.469     | 0.884***       | 15.038 | 40.498    |
| 13:00   | 0.855**        | 1.091  | 3.374     | 0.839***       | 11.688 | 44.15     |
| 16:00   | 0.835**        | 1.402  | -12.163   | 0.938***       | 14.224 | 41.622    |
| 21:00   | 0.499          | 0.203  | 23.698    | 0.627**        | 0.926  | 28.717    |

**Table S6.** Mean PET values at different daytimes according to land cover class

| LAND COVER                                             | 07:00 | 09:00 | 11:00 | 12:00 | 13:00 | 16:00 |
|--------------------------------------------------------|-------|-------|-------|-------|-------|-------|
| Construction sites                                     | 34.55 | 47.85 | 51.29 | 51.6  | 53.31 | 53.06 |
| Industrial and commercial areas                        | 34.41 | 46.9  | 50.59 | 51.34 | 52.79 | 52.37 |
| Road and rail infrastructure                           | 34.12 | 46.58 | 50.18 | 50.71 | 52.45 | 52.02 |
| Water areas                                            | 33.85 | 46.23 | 49.65 | 50.07 | 51.98 | 51.38 |
| Swamps                                                 | 33.77 | 46.21 | 50.14 | 51.85 | 52.61 | 51.59 |
| Meadows                                                | 33.71 | 47.36 | 50.94 | 51.08 | 53.12 | 52.67 |
| Residential areas with continuous fabric               | 33.6  | 45.02 | 48.89 | 49.73 | 51.44 | 50.86 |
| Crops                                                  | 33.49 | 47.25 | 50.64 | 50.84 | 52.92 | 52.35 |
| Quarries and landfills                                 | 33.43 | 46.49 | 49.97 | 50.32 | 52.42 | 52.05 |
| Recreational and sports areas                          | 33.1  | 46.23 | 49.77 | 50.25 | 52.22 | 51.46 |
| Residential areas with discontinuous and sparse fabric | 32.93 | 44.88 | 48.87 | 49.63 | 51.52 | 50.77 |
| Green urban areas                                      | 32.89 | 45.51 | 49.41 | 49.89 | 51.96 | 51.34 |
| Areas with evolving woodland and shrub vegetation      | 32.6  | 45.24 | 49.02 | 49.43 | 51.58 | 50.94 |
| Tree crops                                             | 31.47 | 44.3  | 48.41 | 48.28 | 51.11 | 50.47 |
| Woodland                                               | 28.85 | 40.23 | 44.98 | 45.27 | 48.16 | 46.81 |
